# Supplementary material for: Egg Food Challenges are Associated with More Gastrointestinal Reactions
Source: MDPI journal article supplement (doi:10.3390/children2030371), 2015-08-17

**TABLE 1:** Demographics of patient group challenged for egg compared with patient groups challenged for other foods

|                                                             | <b>All Foods (not egg)</b> | <b>Egg</b>     |
|-------------------------------------------------------------|----------------------------|----------------|
| <b>Male, no. (%)</b>                                        | 1171/1703 (69)             | 424/601 (70)   |
| <b>Atopic history, no. (%)</b>                              |                            |                |
| Asthma                                                      | 1021/1703 (60)             | 341/601 (57)   |
| Atopic Dermatitis                                           | 80/1703 (46)               | 315/601 (52)   |
| Seasonal Allergic Rhinitis                                  | 719/1703 (42)              | 99/601 (16)    |
| <b>Previous reaction</b>                                    | 936/1434 (65%)             | *374/542 (69%) |
| <b>Age (years), mean <math>\pm</math> SD</b>                | 6.7 $\pm$ 3.4              | 5.1 $\pm$ 2.9* |
| <b>Positive OFCs; age (years), mean <math>\pm</math> SD</b> | 6.3 $\pm$ 3.1              | 5.1 $\pm$ 2.8* |

\*p<0.001

**TABLE 2:** Skin test of population with egg challenges based on outcome

|                                                           | <b>Wheal (mm)</b><br><b>mean <math>\pm</math> SD</b> | <b>95% Confidence</b><br><b>Interval</b> |
|-----------------------------------------------------------|------------------------------------------------------|------------------------------------------|
| <b>Negative egg challenges</b>                            | 4.4 $\pm$ 2.8*                                       | 4.1-4.7                                  |
| <b>All positive egg challenges</b>                        | 6.5 $\pm$ 3.4*                                       | 6.0-6.9                                  |
| <b>Positive egg challenges, not requiring epinephrine</b> | 6.5 $\pm$ 3.1                                        | 6.0-7.1                                  |
| <b>Positive egg challenges, requiring epinephrine</b>     | 6.9 $\pm$ 4.2                                        | 5.8-7.9                                  |

\*p<0.0001 T Test

Skin testing was performed using commercial whole egg extract. Egg OFCs were conducted with the use of raw egg powder followed by a scrambled egg.

**TABLE 3:** Prevalence of gastrointestinal symptoms in positive OFCs: egg challenges compared with milk, soy, peanut or tree nuts

|                          | <b>Egg, no. (%)</b> | <i>Milk</i>   | <i>Peanut</i> | <i>Tree nuts</i>         |
|--------------------------|---------------------|---------------|---------------|--------------------------|
| <b>GI only</b>           | 37/244 (15%)        | 15/178 (8%)*  | 14/180 (8%) * | 3/53 (7%)*               |
| <b>GI + skin</b>         | 32/244(13%)         | 23/178 (13%)  | 20/180 (11%)  | 6/53 (11%)               |
| <b>Any GI</b>            | 69/244(28)          | 42/178 (23%)  | 35/180 (20%)* | 9/53 (17%)               |
| <b>Lower respiratory</b> | 65/244 (27%)        | 45/151 (30%)  | 60/139 (43%)  | 16/18 (88%) <sup>#</sup> |
| <b>Multi-system</b>      | 144/244 (59%)       | 111/178 (62%) | 116/180 (64%) | 38/53 (71.7)             |

\*p<0.05 <sup>#</sup>p<0.001 compared to frequency of reactions to egg

**TABLE 4:** Epinephrine treatment in OFCs with positive (failed) outcome

|                     | <b>Egg, no. (%)</b> | <b>Milk, no. (%)</b> | <b>Peanut, no. (%)</b>         | <b>Tree nuts, no.(%)</b> |
|---------------------|---------------------|----------------------|--------------------------------|--------------------------|
| <b>GI only</b>      | 1/37 (3%)           | 2/19 (10%)           | 1/15 (8%)                      | 0/3 (0%)                 |
| <b>GI + skin</b>    | 7/32(22%)           | 4/23 (17%)           | 8/20 (40%)                     | 3/6 (50%)                |
| <b>Any GI</b>       | 8/69 (11%)          | 8/42 (19%)           | 9/35 (25%)                     | 3/9 (33%)                |
| <b>Any reaction</b> | 66/244 (27%)        | 54/178 (30%)         | 76/180<br>(42.2%) <sup>#</sup> | 29/53 (55%) <sup>#</sup> |

#-p<0.001

**Figure 1:**

Rate of reaction on oral food challenges: Food challenges in the last 10 years at The Children's Hospital of Philadelphia were compared. The percentage of oral food challenges with reaction (positive) and percentage with no reaction (negative) are shown. In addition, the number of challenges performed to each food group are listed.

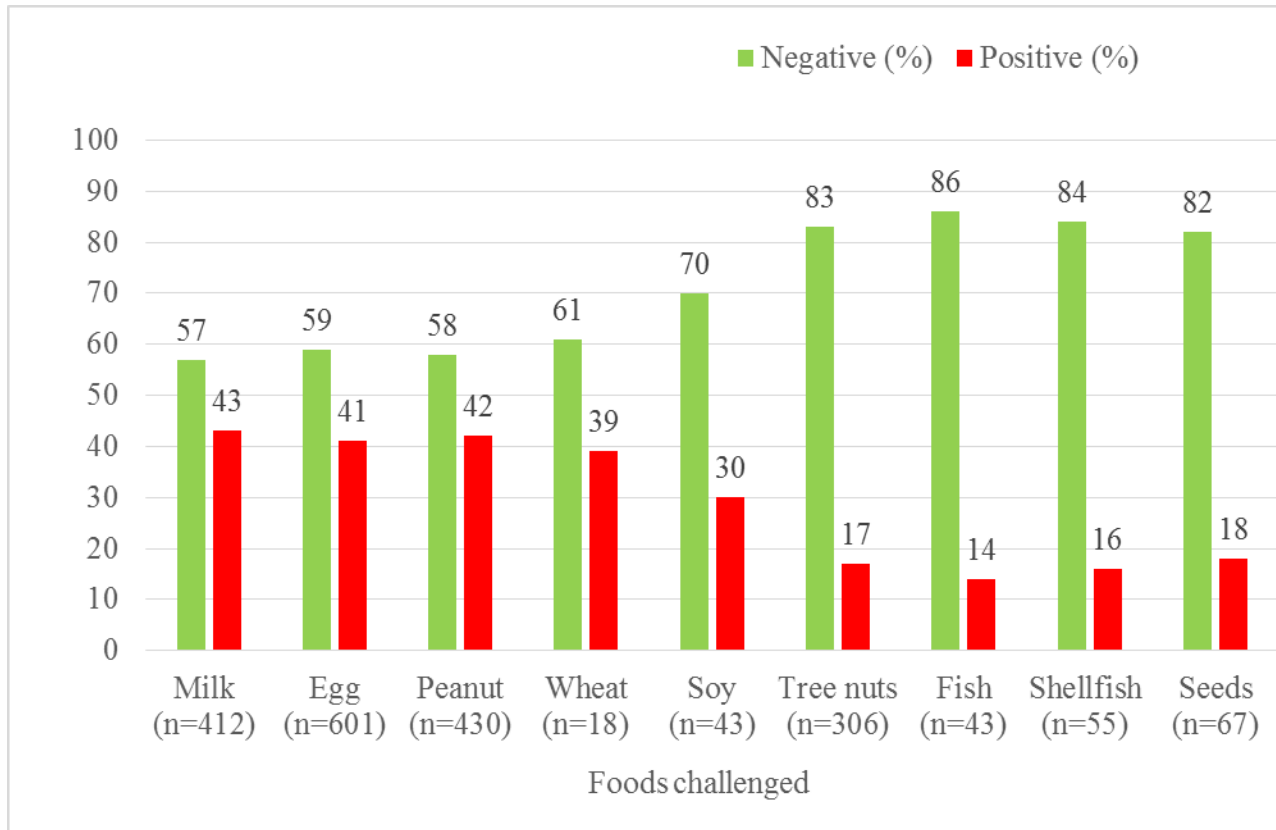

Supplement: s1 [file s1]
